# Supplementary material for: Preclinical Evaluation of Nitroxide-Functionalised Ciprofloxacin as a Novel Antibiofilm Drug Hybrid for Urinary Tract Infections
Source: MDPI journal article supplement (doi:10.3390/antibiotics12101479), 2023-09-22
Supplement: s1 [file s1]

## Supplementary Material

| EC958 |      |      | UTI89 |      |      | EC958 |     |     | UTI89  |        |        |
|-------|------|------|-------|------|------|-------|-----|-----|--------|--------|--------|
| 400   | 400  | 400  | 84    | 84   | 84   | 128   | 128 | 128 | 0.24   | 0.24   | 0.24   |
| 200   | 200  | 200  | 42    | 42   | 42   | 64    | 64  | 64  | 0.12   | 0.12   | 0.12   |
| 100   | 100  | 100  | 21    | 21   | 21   | 32    | 32  | 32  | 0.06   | 0.06   | 0.06   |
| 50    | 50   | 50   | 10.5  | 10.5 | 10.5 | 16    | 16  | 16  | 0.03   | 0.03   | 0.03   |
| 25    | 25   | 25   | 5.25  | 5.25 | 5.25 | 8     | 8   | 8   | 0.015  | 0.015  | 0.015  |
| 12.5  | 12.5 | 12.5 | 2.63  | 2.63 | 2.63 | 4     | 4   | 4   | 0.0075 | 0.0075 | 0.0075 |
| G     | G    | G    | G     | G    | G    | G     | G   | G   | G      | G      | G      |
| D     | D    | D    | D     | D    | D    | HCl   | HCl | HCl | HCl    | HCl    | MH     |
| CDN11 |      |      |       |      |      | CIP   |     |     |        |        |        |

|                                                                                                        |
|--------------------------------------------------------------------------------------------------------|
| <b>Legend</b> (concentrations in $\mu\text{M}$ )                                                       |
| <div></div> - 0% growth, <div></div> - 20% growth, <div></div> - 50% growth, <div></div> - 100% growth |
| G – growth, bacteria in media only                                                                     |
| D/HCl – vehicle control, <b>DMSO</b> or 0.1M <b>HCl</b>                                                |
| MH – media only (Mueller Hinton)                                                                       |

**Supplementary Figure 1. Summary of minimum inhibitory concentration (MIC) assays for CDN11 and ciprofloxacin, against UPEC strains UTI89 and EC958.** MIC values were determined as per the CLSI standards [1]. The MIC for a compound was defined as the lowest concentration that prevented visible bacterial growth after 18 h of static incubation at 37°C. MICs were performed a minimum of two times with three technical replicates per condition.

## References

1. Clinical and Laboratory Standards Institute (CLSI). *Performance Standards for Antimicrobial Susceptibility Testing*, 28th ed.; Clinical and Laboratory Standards Institute, 950 West Valley Road, Suite 2500, Wayne, Pennsylvania 19087 USA. , 2018.
